# Supplementary material
Source: PubMed Central journal article supplement (PMC1609923)
Supplement: bj3990325add.pdf [file bj3990325add.pdf]

**TABLE I**

Table 1. Mean open and closed time constants of single CRCs in various experimental conditions

|                                                                     | $P_o$                  | Open                                                          |                                                         | Closed                                                        |                                                         |
|---------------------------------------------------------------------|------------------------|---------------------------------------------------------------|---------------------------------------------------------|---------------------------------------------------------------|---------------------------------------------------------|
|                                                                     |                        | $\tau_o$ (ms)                                                 | Proportion (%)                                          | $\tau_c$ (ms)                                                 | Proportion (%)                                          |
| <b>Native RyR1</b>                                                  |                        |                                                               |                                                         |                                                               |                                                         |
| 10 $\mu$ M $Ca^{2+}$ (12)                                           | $0.175 \pm 0.08$       | $0.318 \pm 0.025$<br>$3.674 \pm 0.407$                        | $93.79 \pm 1.66$<br>$6.21 \pm 1.66$                     | $1.372 \pm 0.116$<br>$5.861 \pm 0.477$                        | $44.10 \pm 3.86$<br>$55.90 \pm 3.86$                    |
| 10 $\mu$ M $Ca^{2+}$ + 10 $\mu$ M DIDS (10)                         | $0.451 \pm 0.038^*$    | $0.674 \pm 0.276$<br>$10.200 \pm 3.524$<br>$16.820 \pm 5.340$ | $79.95 \pm 3.10$<br>$16.35 \pm 1.95$<br>$3.70 \pm 1.15$ | $1.063 \pm 0.327$<br>$9.807 \pm 3.393$<br>$29.067 \pm 11.643$ | $56.19 \pm 5.88$<br>$34.84 \pm 3.35$<br>$8.97 \pm 2.53$ |
| 10 $\mu$ M $Ca^{2+}$ + 3 mM caffeine (4)                            | $0.300 \pm 0.02^*$     | $0.302 \pm 0.014$<br>$4.532 \pm 0.648$                        | $88.95 \pm 1.20$<br>$11.05 \pm 1.20$                    | $0.919 \pm 0.092$<br>$3.467 \pm 0.196$                        | $63.95 \pm 3.50$<br>$36.05 \pm 3.50$                    |
| <b>Purified RyR1</b>                                                |                        |                                                               |                                                         |                                                               |                                                         |
| 10 $\mu$ M $Ca^{2+}$ (25)                                           | $0.159 \pm 0.014$      | $0.366 \pm 0.016$<br>$3.722 \pm 0.471$                        | $84.48 \pm 2.76$<br>$15.52 \pm 2.76$                    | $0.885 \pm 0.069$<br>$6.193 \pm 0.499$                        | $53.21 \pm 3.67$<br>$46.79 \pm 3.67$                    |
| 10 $\mu$ M $Ca^{2+}$ + 10 $\mu$ M DIDS (14)                         | $0.206 \pm 0.025$      | $0.359 \pm 0.030$<br>$3.639 \pm 0.563$                        | $89.65 \pm 2.01$<br>$10.35 \pm 2.01$                    | $0.848 \pm 0.061$<br>$7.142 \pm 0.860$                        | $52.32 \pm 3.53$<br>$47.68 \pm 3.53$                    |
| 10 $\mu$ M $Ca^{2+}$ + 10 $\mu$ M DIDS + 35 $\mu$ g/ml aldolase (7) | $0.401 \pm 0.038^{**}$ | $0.579 \pm 0.038$<br>$8.088 \pm 1.471$<br>$20.157 \pm 11.398$ | $78.01 \pm 4.51$<br>$16.47 \pm 1.46$<br>$5.52 \pm 3.05$ | $0.720 \pm 0.063$<br>$5.568 \pm 1.551$<br>$33.834 \pm 16.247$ | $63.66 \pm 4.08$<br>$27.36 \pm 0.94$<br>$8.98 \pm 3.14$ |
| 10 $\mu$ M $Ca^{2+}$ + 3 mM caffeine (5)                            | $0.281 \pm 0.028^{**}$ | $0.371 \pm 0.028$<br>$4.602 \pm 0.769$                        | $87.82 \pm 2.52$<br>$12.18 \pm 2.52$                    | $0.736 \pm 0.085$<br>$4.992 \pm 0.825$                        | $61.60 \pm 5.11$<br>$38.40 \pm 5.11$                    |

Values are the means  $\pm$  SE for the number of channels shown in parenthesis. Each channel was studied for 1 min with 2 observations and average value was calculated. One-way analysis of ANOVA was used to test significance between the means of different pairs of data sets. Asterisks indicate statistically significant differences among the 3 groups for native RyR1 (ANOVA,  $P < 0.01$ ). Double asterisks indicate statistically significant differences among the 4 groups for purified RyR1 (ANOVA,  $P < 0.01$ ).

**TABLE II**

Table 2. Effects of DIDS binding proteins in the presence of purified CRC and DIDS

| Proteins             | P <sub>o</sub>         |                                     |
|----------------------|------------------------|-------------------------------------|
|                      | 10 μM Ca <sup>2+</sup> | 10 μM Ca <sup>2+</sup> + 10 μM DIDS |
| GAPDH                | 0.13 ± 0.04            | 0.17 ± 0.03                         |
| Malate dehydrogenase | 0.21 ± 0.06            | 0.27 ± 0.04                         |
| Adenylate kinase     | 0.17 ± 0.07            | 0.14 ± 0.05                         |
| Aldolase             | 0.19 ± 0.03            | 0.42 ± 0.05*                        |

The experiments were carried out as described in the legend to Fig. 5. Values are the mean ± SE for 3 independent experiments. \* Significantly different between the 2 experimental groups (unpaired *t*-test,  $p < 0.05$ ).
